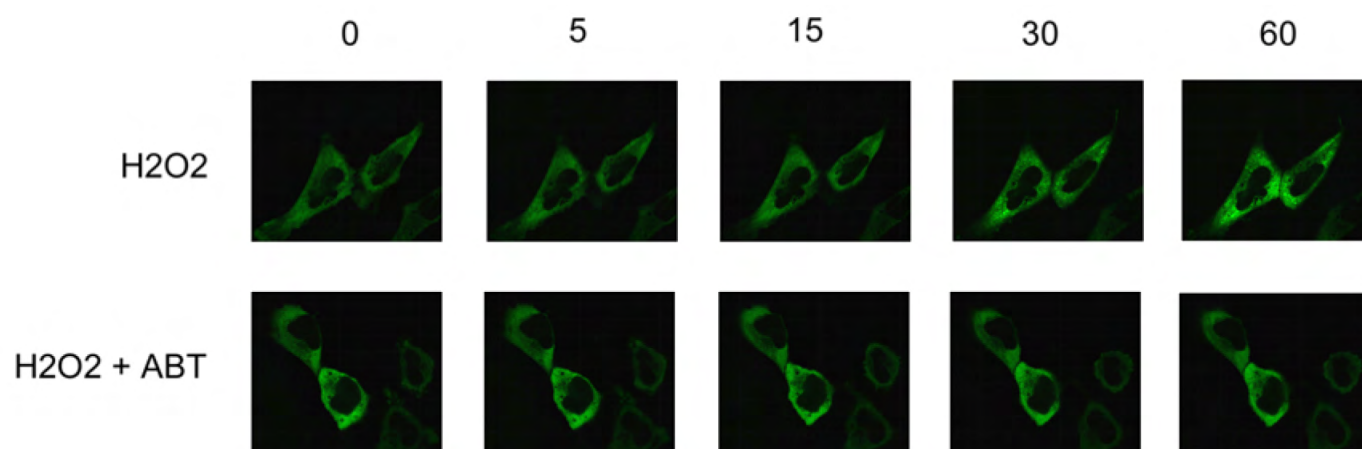

**Fig. S1. Microscopy experiments with live cells reveal G3BP foci formation upon DNA damage.**
